# Supplementary material for: Coordinationversusspodium bonds in dinuclear Zn(ii) and Cd(ii) complexes with a dithiophosphate ligand
Source: Royal Society of Chemistry journal article supplement (doi:10.1039/d1nj03165a), 2021-01-01
Supplement: d1nj03165a1.pdf [file d1nj03165a1.pdf]

**Electronic Supplementary Information**

**Coordination versus spodium bonds in the dinuclear Zn(II) and Cd(II) complexes with a dithiophosphate ligand**

Pretam Kumar<sup>a</sup>, Antonio Frontera<sup>b</sup> and Sushil K. Pandey<sup>\*a</sup>

*<sup>a</sup>Post Graduate Department of Chemistry, University of Jammu, Baba Saheb Ambedkar Road, Jammu Tawi-180006, J&K, INDIA*

*<sup>b</sup>Departament de Química, Universitat de les Illes Balears, Crta de Valldemossa km 7.5, 07122 Palma de Mallorca (Balears), SPAIN*

*\*Email: [kpsushil@rediffmail.com](mailto:kpsushil@rediffmail.com)*

**Table S1** Selected bond lengths (angstroms) of complexes **1** and **2**

| <b>Complex 1</b>    |             | <b>Complex 2</b>     |           |
|---------------------|-------------|----------------------|-----------|
| Zn1—S4 <sup>i</sup> | 2.3394 (10) | Cd1—S4               | 3.003 (3) |
| Zn1—S2              | 2.4321 (11) | Cd1—S4 <sup>ii</sup> | 2.584 (3) |
| Zn1—S3              | 2.3146 (11) | Cd1—S1               | 2.602 (3) |
| Zn1—S1              | 2.3578 (12) | Cd1—S2               | 2.582 (3) |
| S4—Zn1 <sup>i</sup> | 2.3394 (10) | Cd1—S3               | 2.590 (3) |
| S4—P2               | 1.9869 (14) | S4—P2                | 2.020 (3) |
| P2—S3               | 1.9971 (15) | S1—P1                | 1.982 (4) |
| P2—O4               | 1.596 (3)   | P1—S2                | 1.983 (4) |
| P2—O3               | 1.588 (3)   | P1—O1                | 1.592 (6) |

|        |             |        |            |
|--------|-------------|--------|------------|
| S2—P1  | 1.9791 (15) | P1—O2  | 1.594 (7)  |
| P1—S1  | 1.9895 (15) | P2—S3  | 1.975 (4)  |
| P1—O1  | 1.584 (3)   | P2—O4  | 1.583 (7)  |
| P1—O2  | 1.596 (3)   | P2—O3  | 1.579 (7)  |
| O4—C31 | 1.415 (4)   | O1—C1  | 1.401 (11) |
| O1—C1  | 1.407 (5)   | O4—C31 | 1.431 (11) |
| O3—C21 | 1.422 (5)   | O3—C21 | 1.415 (11) |
| O2—C11 | 1.410 (5)   | O2—C11 | 1.410 (11) |

Symmetry code(s): (i)  $-x+1, y, -z+3/2$ ; (ii)  $-x+1, -y+1, -z+1$ .

**Table S2** Selected bond angles (degrees) of complexes **1** and **2**

| <b>Complex 1</b>        |            | <b>Complex 2</b>         |            |
|-------------------------|------------|--------------------------|------------|
| S4 <sup>i</sup> —Zn1—S2 | 105.95 (4) | S4 <sup>ii</sup> —Cd1—S4 | 86.47 (8)  |
| S4 <sup>i</sup> —Zn1—P1 | 112.53 (4) | S4 <sup>ii</sup> —Cd1—S1 | 104.61 (8) |
| S4 <sup>i</sup> —Zn1—S1 | 111.76 (4) | S4 <sup>ii</sup> —Cd1—P1 | 137.63 (8) |
| S2—Zn1—P1               | 43.10 (3)  | S4—Cd1—P1                | 127.40 (7) |
| S3—Zn1—S4 <sup>i</sup>  | 120.39 (4) | S4 <sup>ii</sup> —Cd1—S3 | 103.13 (9) |
| S3—Zn1—S2               | 112.70 (4) | S1—Cd1—S4                | 167.60 (8) |
| S3—Zn1—P1               | 126.83 (4) | S1—Cd1—P1                | 40.20 (8)  |
| S3—Zn1—S1               | 114.16 (4) | S2—Cd1—S4 <sup>ii</sup>  | 145.16 (9) |

|                        |             |                           |             |
|------------------------|-------------|---------------------------|-------------|
| S1—Zn1—S2              | 86.48 (4)   | S2—Cd1—S4                 | 87.59 (8)   |
| S1—Zn1—P1              | 43.64 (3)   | S2—Cd1—S1                 | 80.13 (8)   |
| P2—S4—Zn1 <sup>i</sup> | 101.78 (5)  | S2—Cd1—P1                 | 40.27 (8)   |
| S4—P2—S3               | 117.56 (7)  | S2—Cd1—S3                 | 108.10 (9)  |
| O4—P2—S4               | 109.06 (12) | S3—Cd1—S4                 | 73.99 (8)   |
| O4—P2—S3               | 109.47 (11) | S3—Cd1—S1                 | 108.12 (9)  |
| O3—P2—S4               | 108.14 (11) | S3—Cd1—P1                 | 109.89 (8)  |
| O3—P2—S3               | 110.82 (13) | Cd1 <sup>ii</sup> —S4—Cd1 | 93.53 (8)   |
| O3—P2—O4               | 100.41 (15) | P2—S4—Cd1 <sup>ii</sup>   | 93.48 (11)  |
| P1—S2—Zn1              | 79.80 (5)   | P2—S4—Cd1                 | 77.44 (10)  |
| P2—S3—Zn1              | 99.34 (5)   | P1—S1—Cd1                 | 81.89 (11)  |
| S2—P1—S1               | 111.56 (6)  | S1—P1—Cd1                 | 57.91 (10)  |
| O1—P1—S2               | 108.26 (12) | S1—P1—S2                  | 114.61 (16) |
| O1—P1—S1               | 112.94 (12) | S2—P1—Cd1                 | 57.35 (10)  |
| O1—P1—O2               | 99.04 (15)  | O1—P1—Cd1                 | 136.9 (3)   |
| O2—P1—S2               | 112.74 (12) | O1—P1—S1                  | 107.7 (3)   |
| O2—P1—S1               | 111.69 (13) | O1—P1—S2                  | 112.4 (3)   |
| P1—S1—Zn1              | 81.48 (5)   | O1—P1—O2                  | 100.4 (3)   |
| C31—O4—P2              | 122.0 (2)   | O2—P1—Cd1                 | 122.7 (3)   |
| C1—O1—P1               | 127.7 (3)   | O2—P1—S1                  | 110.2 (3)   |

|            |           |            |             |
|------------|-----------|------------|-------------|
| C21—O3—P2  | 121.8 (2) | O2—P1—S2   | 110.7 (3)   |
| C11—O2—P1  | 126.1 (2) | P1—S2—Cd1  | 82.39 (11)  |
| C2—C1—O1   | 125.4 (4) | S3—P2—S4   | 115.66 (16) |
| C6—C1—O1   | 114.1 (4) | O4—P2—S4   | 103.2 (3)   |
| C36—C31—O4 | 118.7 (4) | O4—P2—S3   | 113.2 (3)   |
| C32—C31—O4 | 120.1 (3) | O3—P2—S4   | 112.0 (3)   |
| C16—C11—O2 | 115.2 (4) | O3—P2—S3   | 111.2 (3)   |
| C12—C11—O2 | 123.5 (3) | O3—P2—O4   | 100.3 (4)   |
| C22—C21—O3 | 119.6 (4) | P2—S3—Cd1  | 89.15 (12)  |
| C26—C21—O3 | 118.6 (4) | C1—O1—P1   | 124.7 (6)   |
|            |           | C31—O4—P2  | 121.5 (6)   |
|            |           | C21—O3—P2  | 127.8 (6)   |
|            |           | C11—O2—P1  | 120.1 (6)   |
|            |           | C32—C31—O4 | 118.4 (8)   |
|            |           | C36—C31—O4 | 120.5 (9)   |
|            |           | O1—C1—C6   | 116.5 (9)   |
|            |           | C2—C1—O1   | 124.8 (9)   |
|            |           | C22—C21—O3 | 123.0 (8)   |
|            |           | C26—C21—O3 | 115.9 (8)   |
|            |           | C16—C11—O2 | 118.6 (9)   |

Symmetry code(s): (i)  $-x+1, y, -z+3/2$ ; (ii)  $-x+1, -y+1, -z+1$ .

---

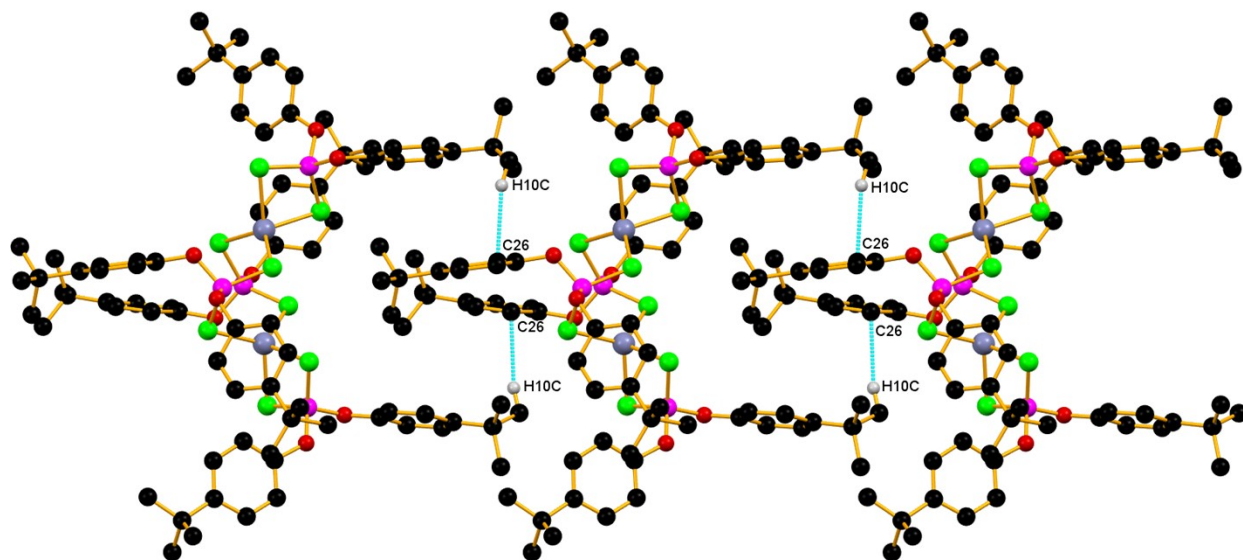

**Fig. S1** Supramolecular chain of the complex 1 generated through intermolecular C...H interactions ( $C6—H10\cdots C26' = 2.796 \text{ \AA}$ ). Only the relevant hydrogen atoms are shown for clarity. Symmetry transformation (') =  $1 - x, -1 + y, 1.5 - z$ .

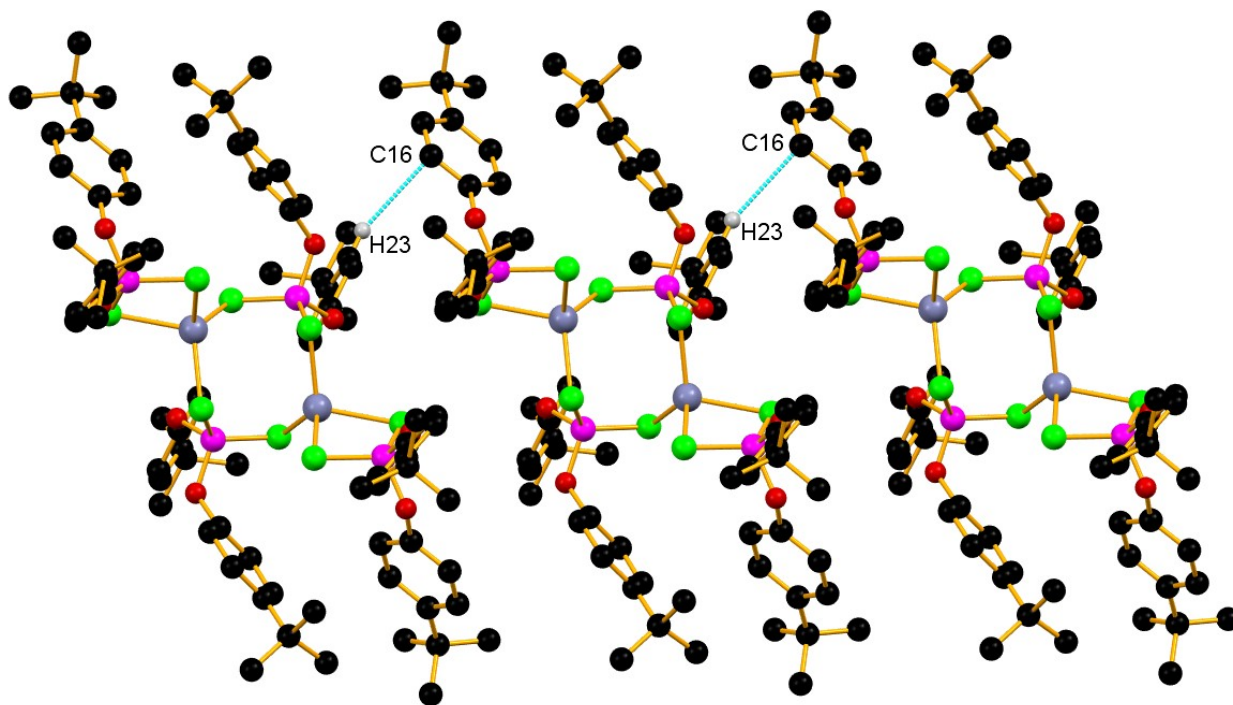

**Fig. S2** Supramolecular chain of the complex **1** generated through intermolecular C...H interactions ( $C23-H23\cdots C16' = 2.885 \text{ \AA}$ ). Only the relevant hydrogen atoms are shown for clarity. Symmetry transformation ( $'$ ) =  $1/2+x, -1/2+y, +z$ .

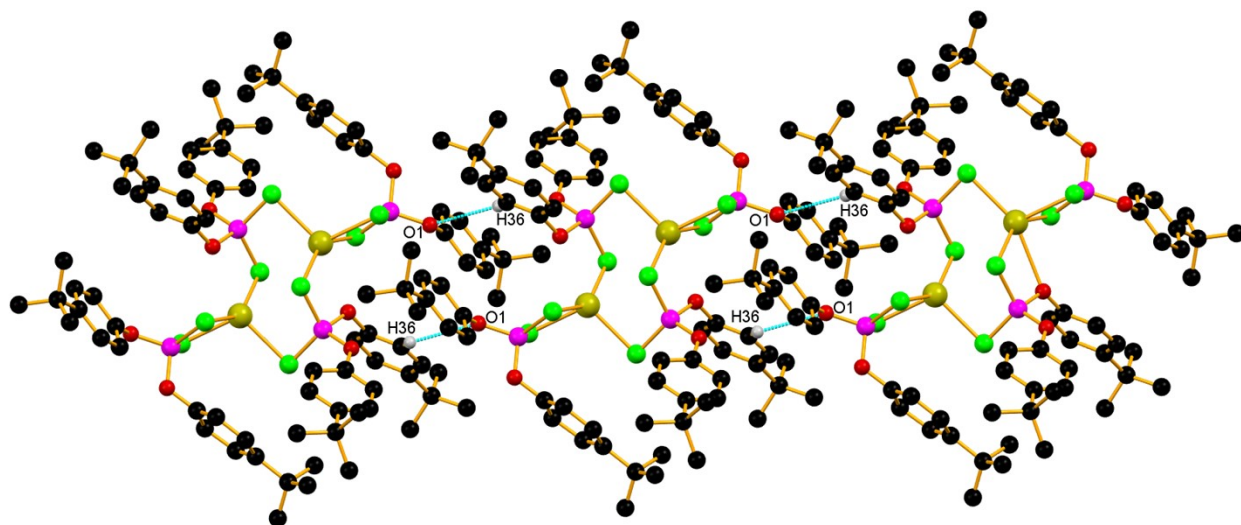

**Fig. S3** Supramolecular chain of complex **2** generated through CH $\cdots$ O interactions (C36—H36 $\cdots$ O1' = 2.720 Å). Only the relevant hydrogen atoms are shown for clarity. Symmetry transformation (') = x, -1 + y, z.

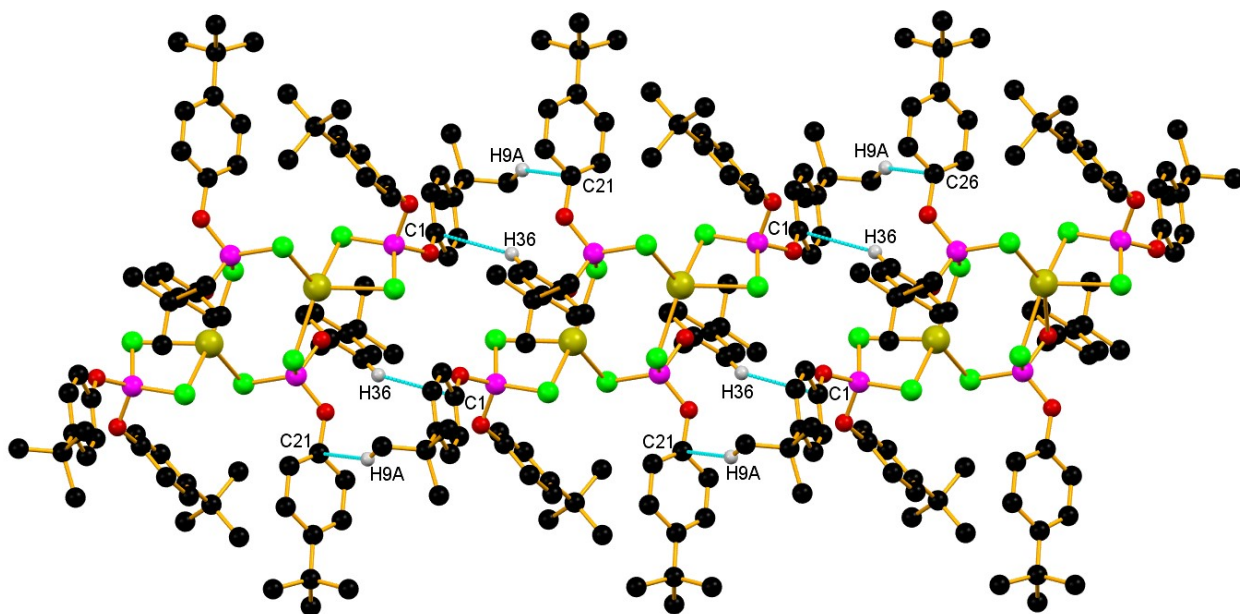

**Fig. S4** Supramolecular chain of the complex **2** generated through intermolecular C $\cdots$ H interactions (C36—H36 $\cdots$ C1' = 2.847 Å and C9—H9A $\cdots$  C21' = 2.889 Å). Only the relevant hydrogen atoms are shown for clarity. Symmetry transformation (') = x, -1 + y, z.

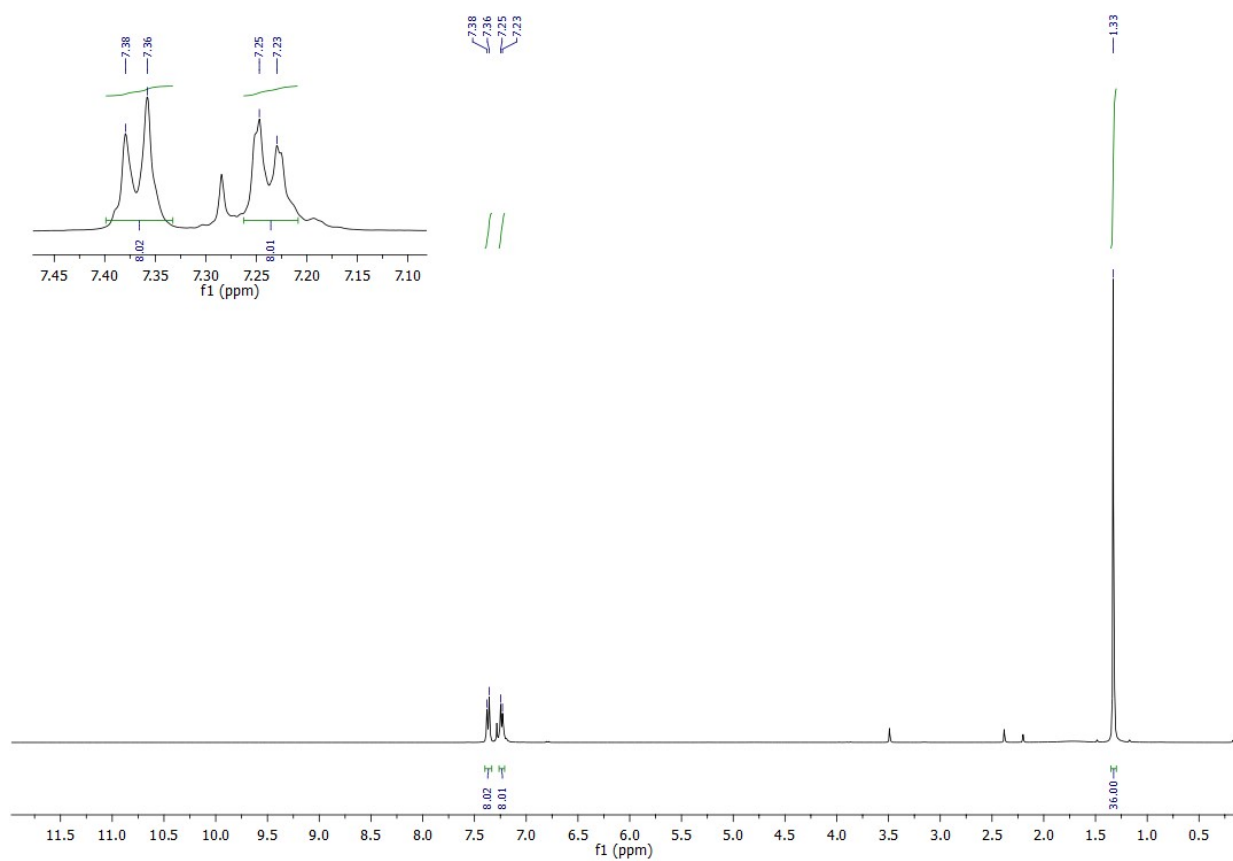

**Fig. S5**  $^1\text{H}$  NMR spectra of complex **1** ( $\text{CDCl}_3$ )



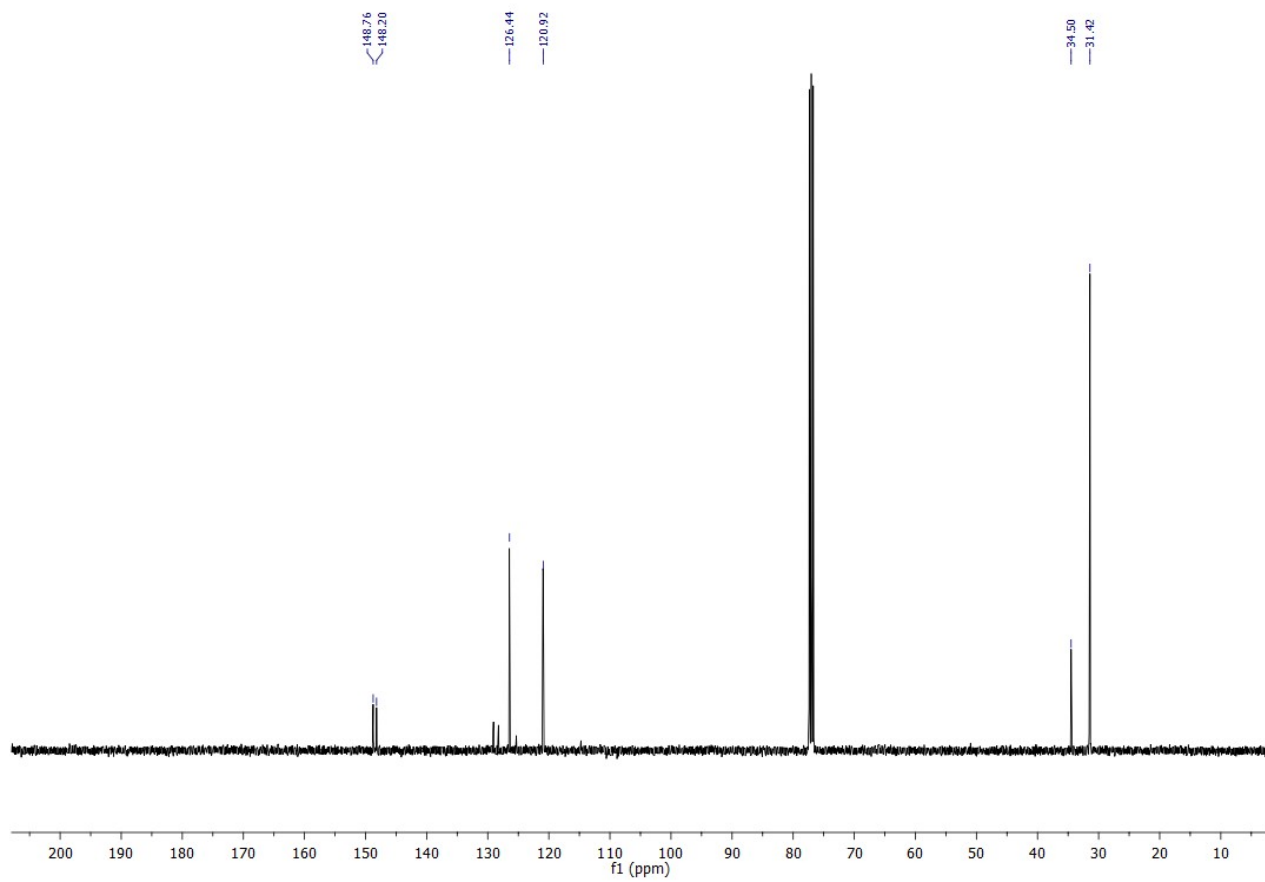

**Fig. S6**  $^{13}\text{C}$  NMR spectra of complex 1 ( $\text{CDCl}_3$ )

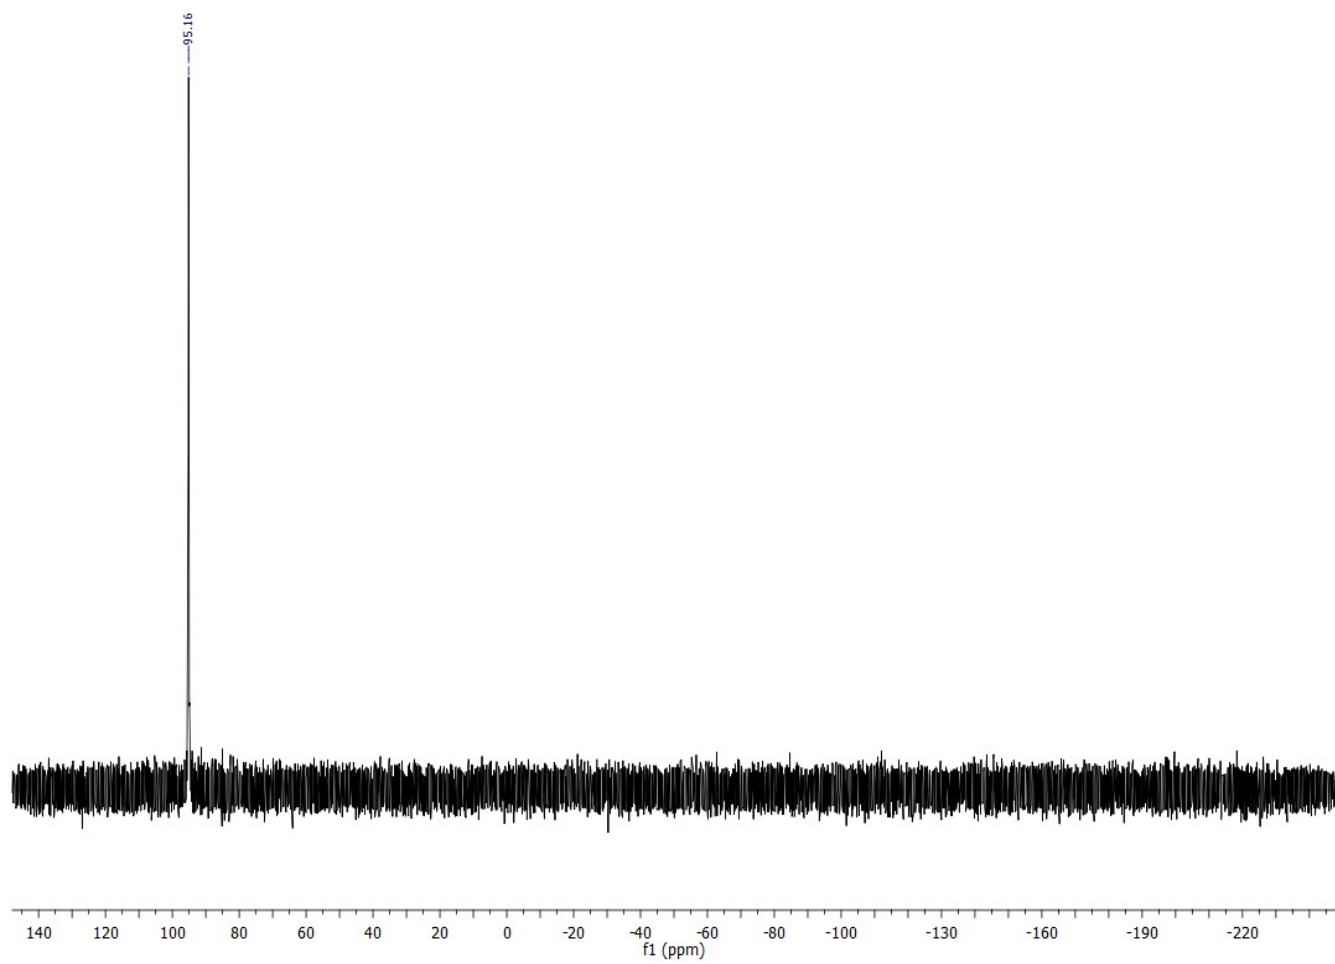

**Fig. S7**  $^{31}\text{P}$  NMR spectra of complex **1** ( $\text{CDCl}_3$ )

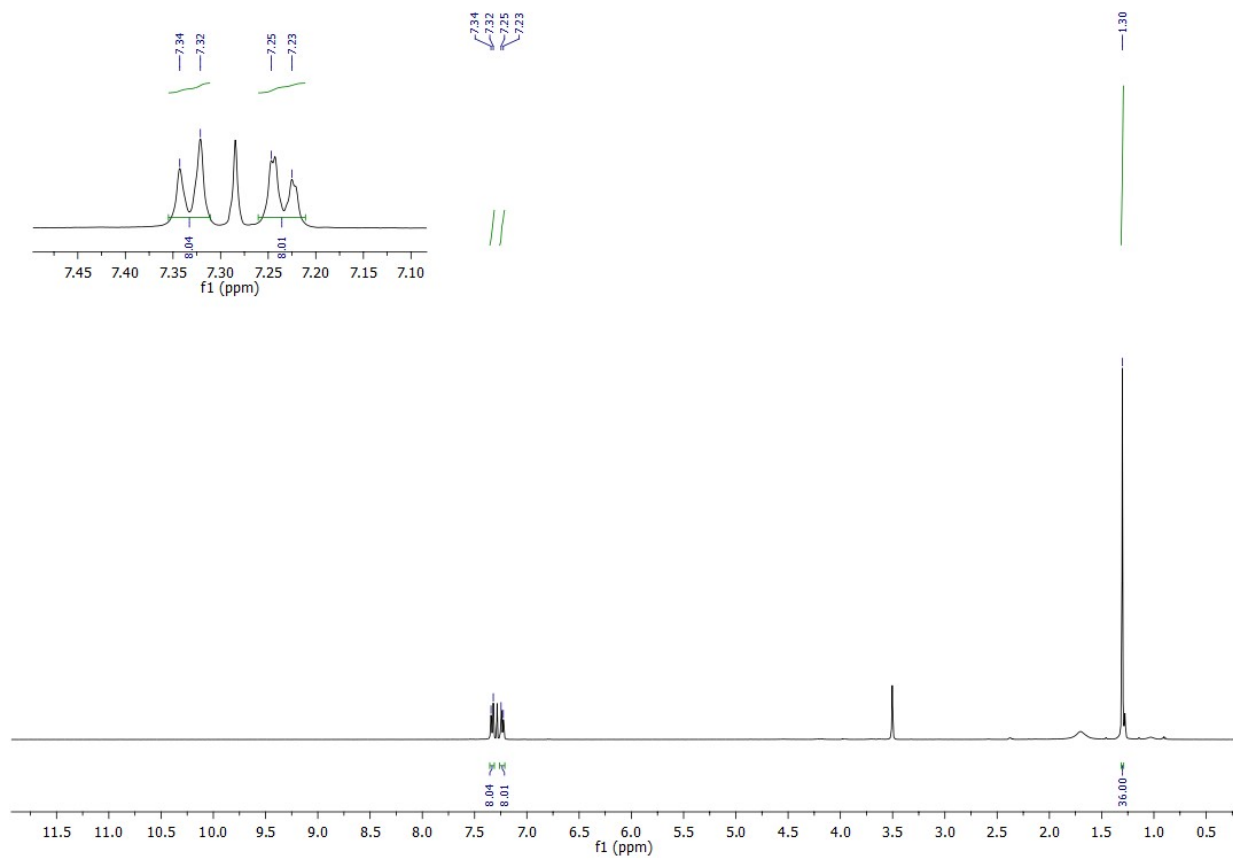

**Fig. S8**  $^1\text{H}$  NMR spectra of complex **2** ( $\text{CDCl}_3$ )

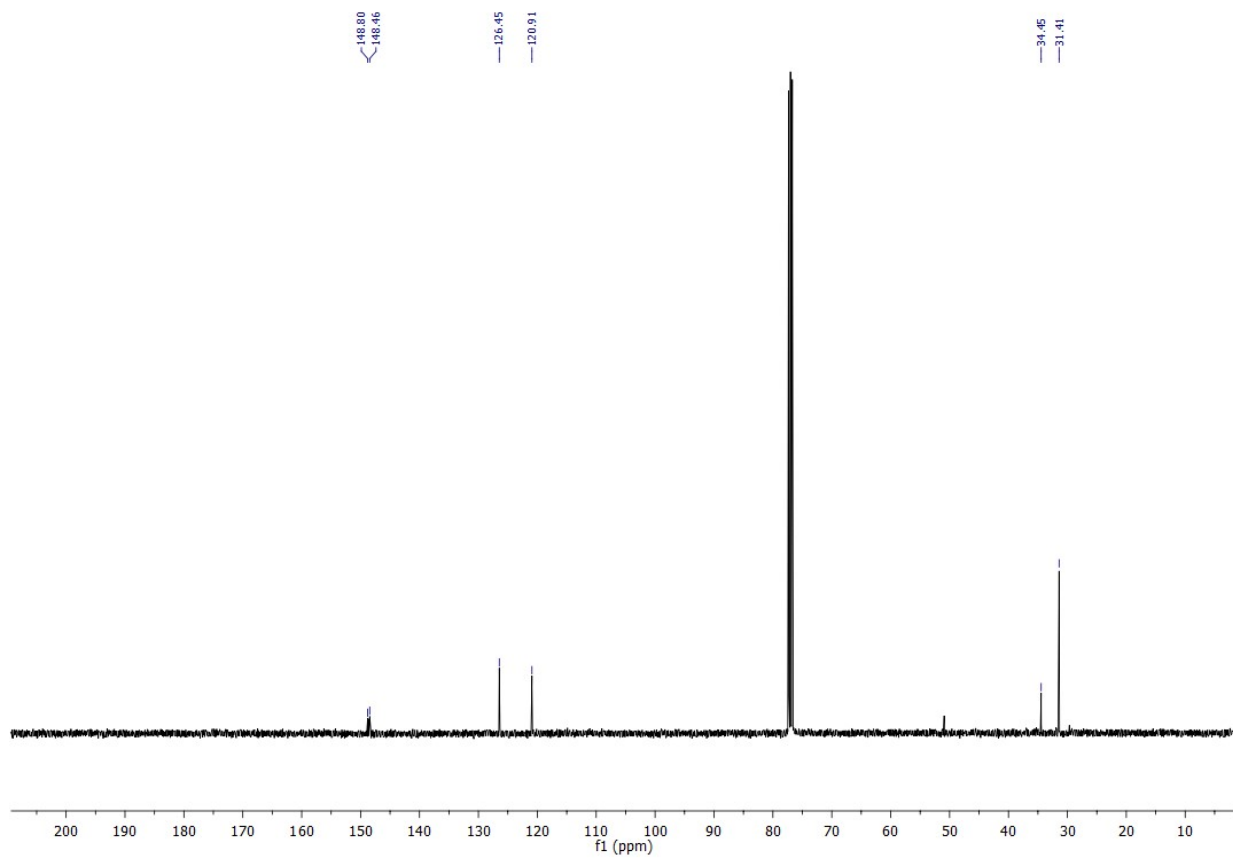

**Fig. S9**  $^{13}\text{C}$  NMR spectra of complex **2** ( $\text{CDCl}_3$ )

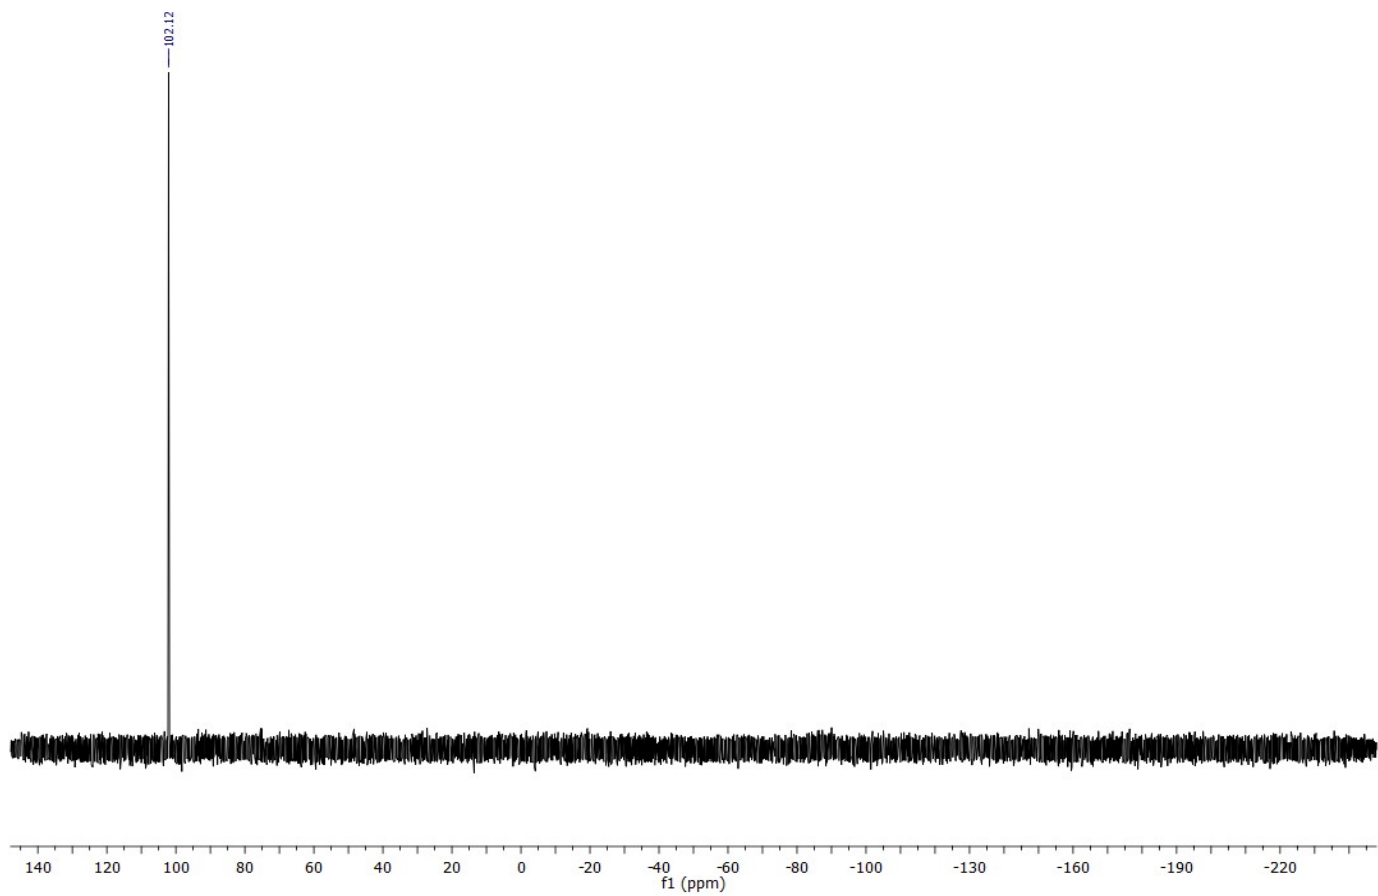

**Fig. S10**  $^{31}\text{P}$  NMR spectra of complex **2** ( $\text{CDCl}_3$ )

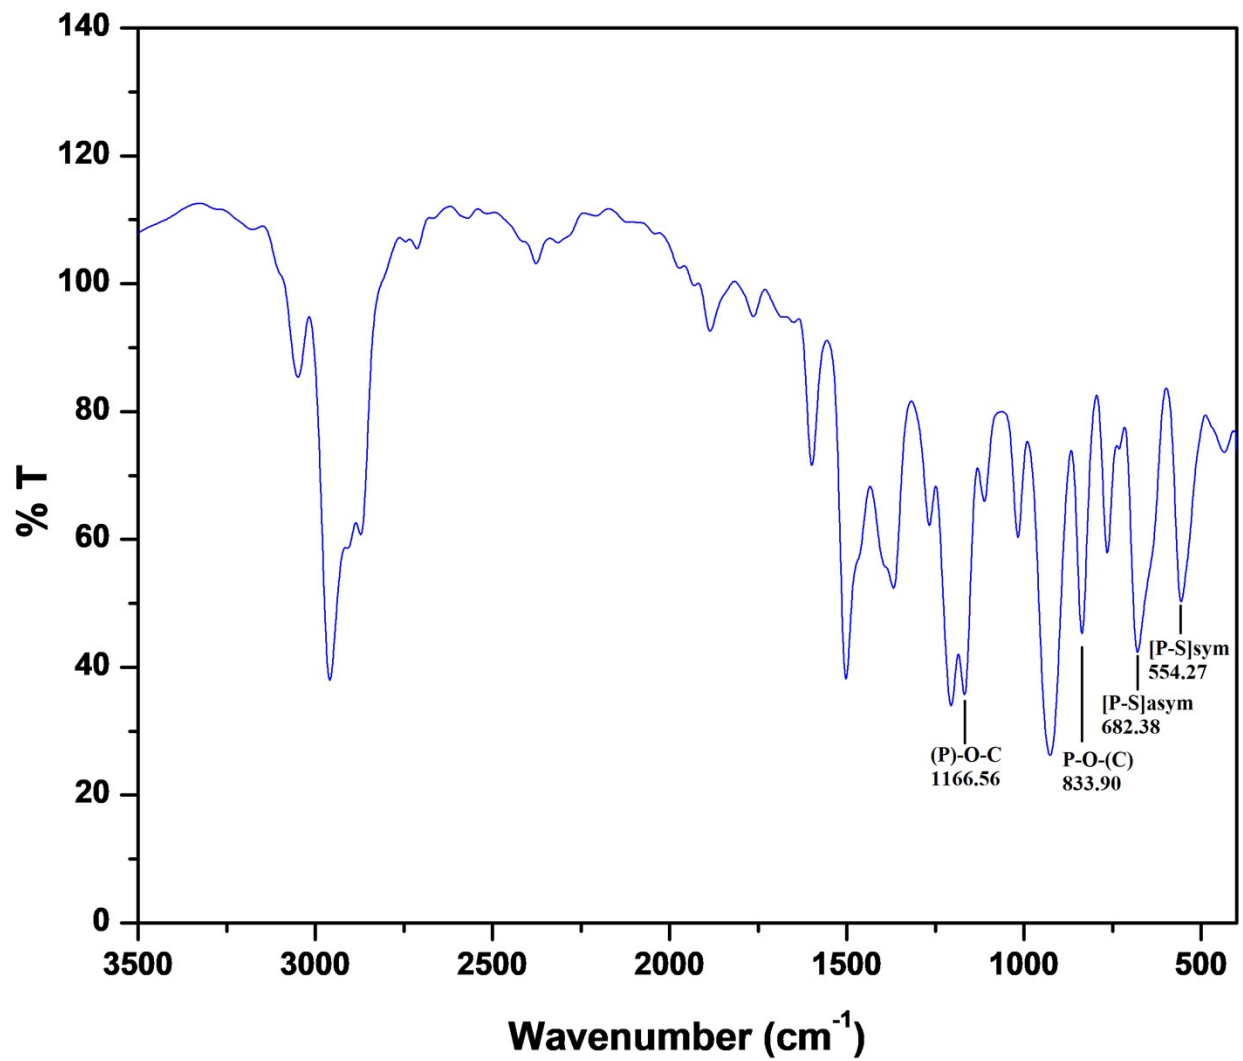

Fig. S11 FTIR spectra of complex 1

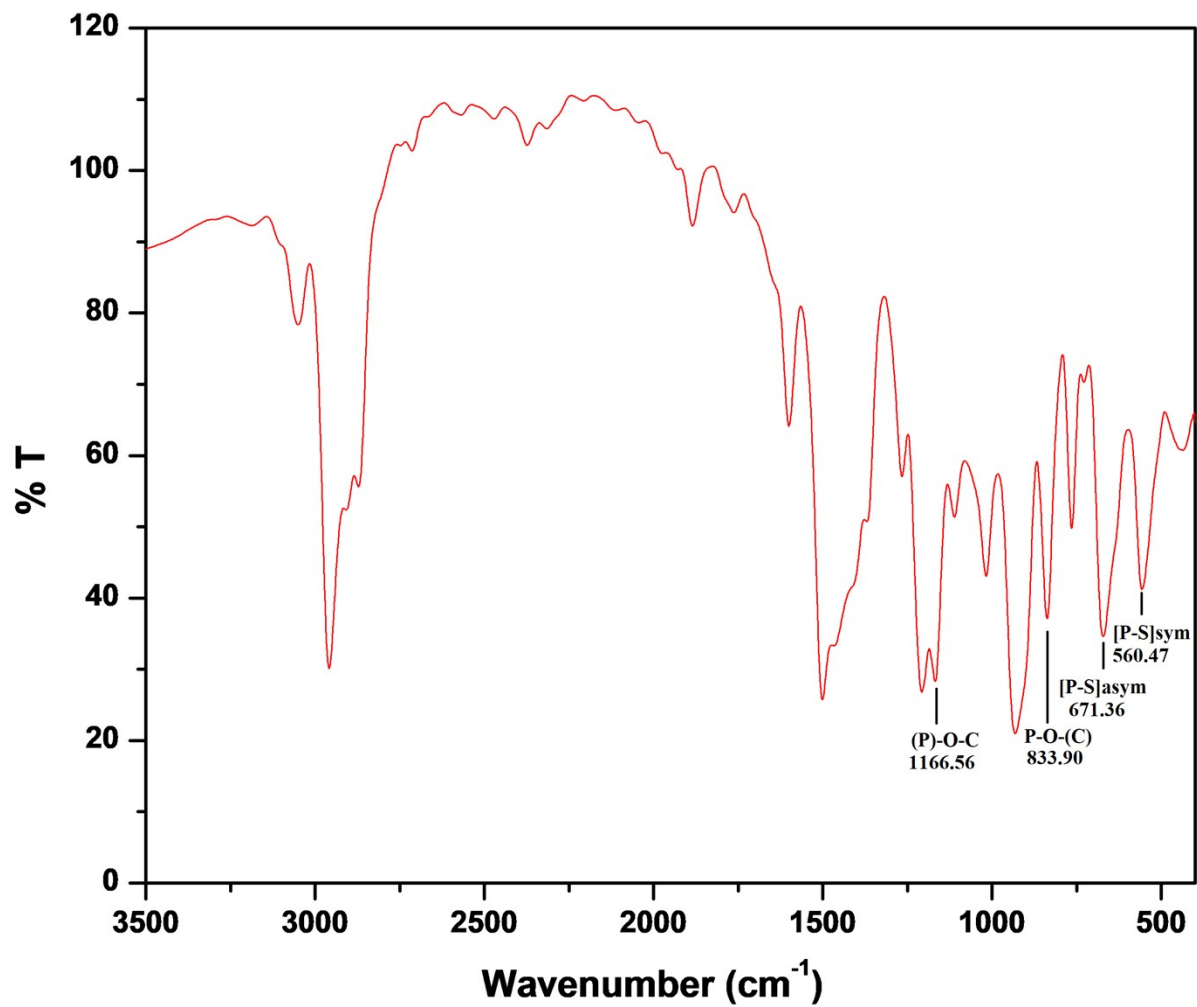

Fig. S12 FTIR spectra of complex 2

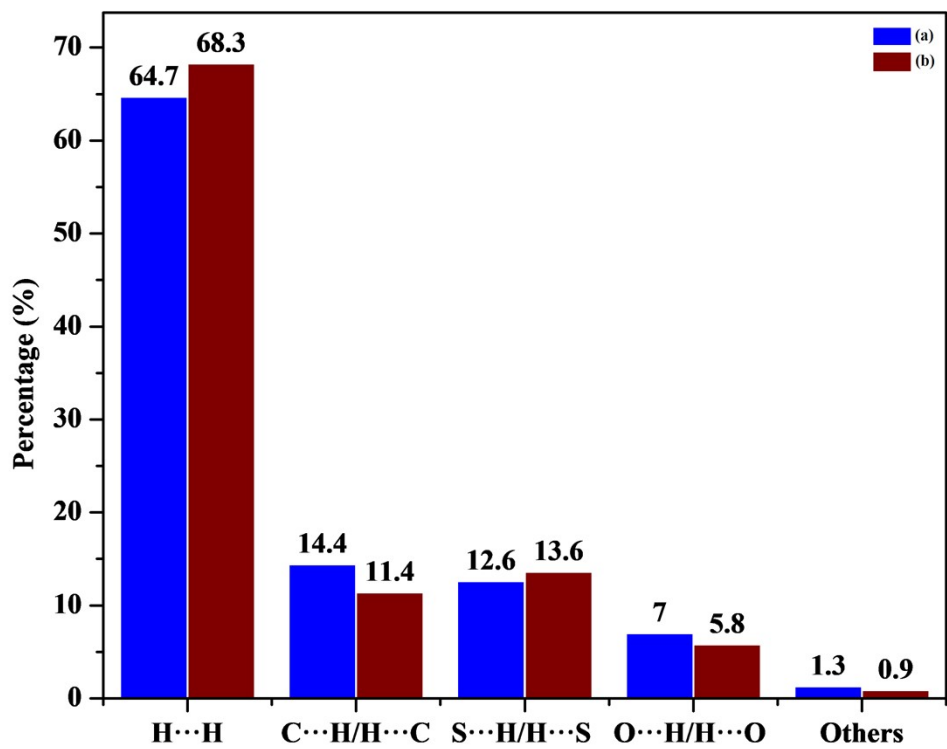

**Fig. S13** Relative contributions of various intermolecular contacts to the Hirshfeld surface area of complexes (a) **1** and (b) **2**.
